# Supplementary material
Source: Springer Nature journal article supplement (http://www.springermedizin.de/resource/supplementary/12937_2010_305_MOESM5_ESM.pdf/25654828)

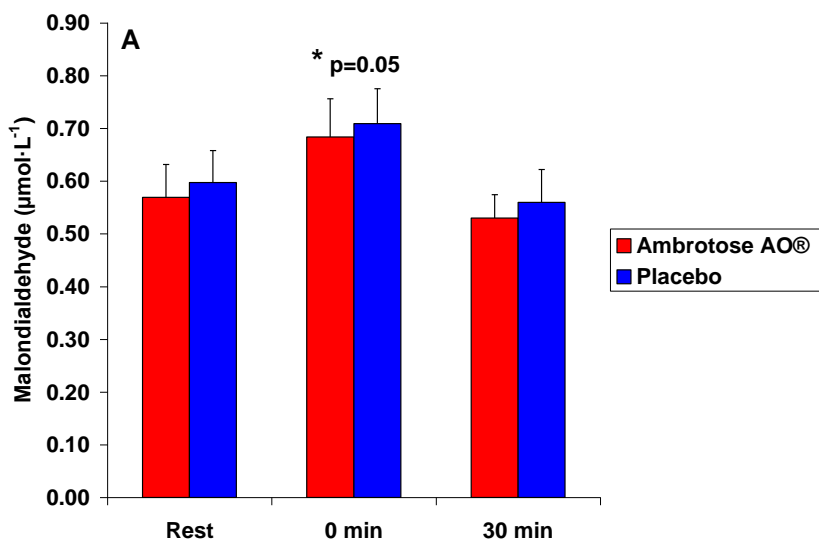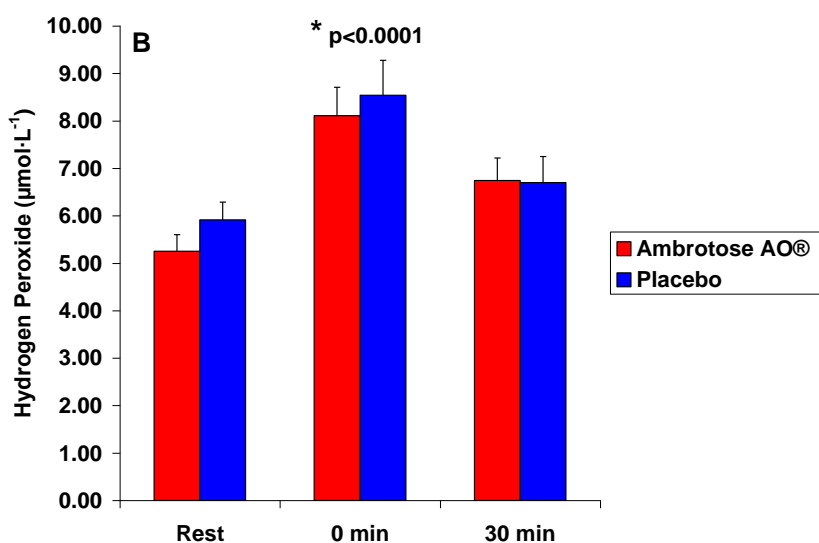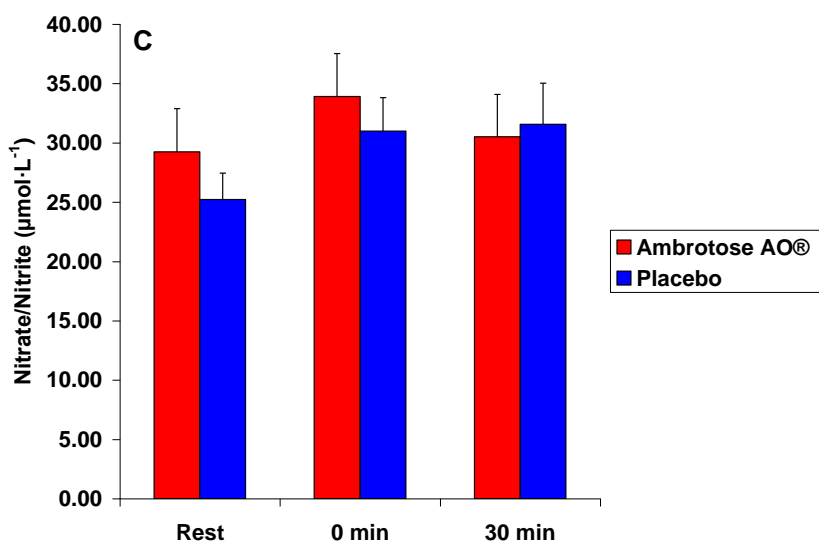

Supplement: MOESM5 [file 25654828]
